# Supplementary material for: Differences in Diffusion of FDA Antidepressant Risk Warnings Across Racial-Ethnic Groups
Source: Atypon-hosted journal article supplement (doi:10.1176/appi.ps.201200087), 2013-02-15
Supplement: 466_ds001.pdf [file 466_ds001.pdf]

Online Appendix

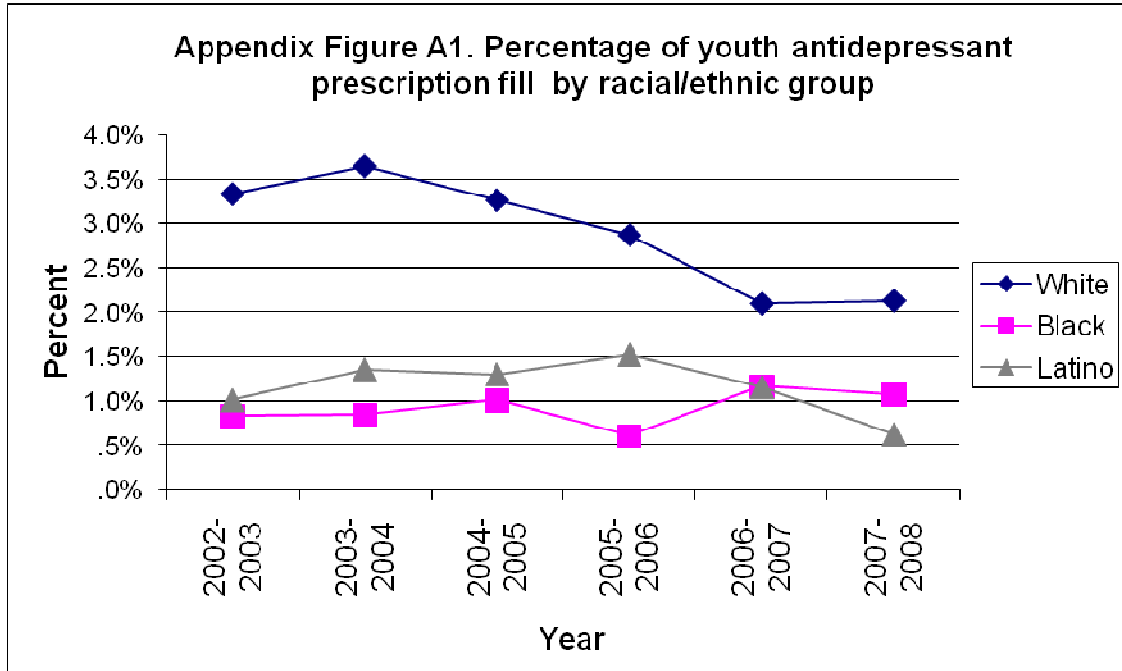

Source: 2002-2008 Medical Expenditure Panel Survey; Age 5 – 18

All Black-white and Latino-white disparities are significant at the  $p < .05$  level with the exception of the Black-white disparity in 2006-2007.

Black-white and Latino-white disparities in 2006-2007 are significantly different from disparities in 2002-2003

|        | 2002-2003 |     | 2003-2004 |     | 2004-2005 |     | 2005-2006 |     | 2006-2007 |     | 2007-2008 |     |
|--------|-----------|-----|-----------|-----|-----------|-----|-----------|-----|-----------|-----|-----------|-----|
|        | Mean      | SE  |
| White  | 3.3%      | .3% | 3.7%      | .3% | 3.3%      | .3% | 2.9%      | .3% | 2.1%      | .2% | 2.1%      | .3% |
| Black  | .8%       | .2% | .9%       | .2% | 1.0%      | .2% | .6%       | .2% | 1.2%      | .4% | 1.1%      | .3% |
| Latino | 1.0%      | .2% | 1.4%      | .3% | 1.3%      | .3% | 1.5%      | .3% | 1.2%      | .2% | .6%       | .2% |

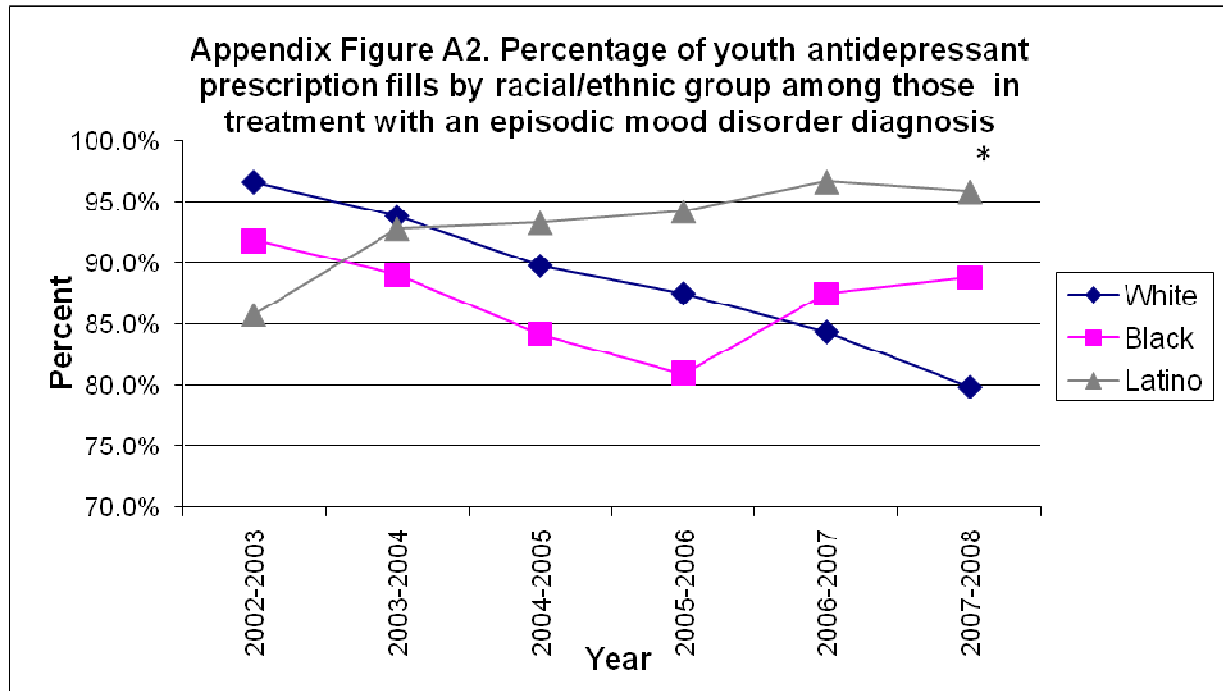

Source: 2002-2008 Medical Expenditure Panel Survey; Age 5 – 18

\* Difference from whites in this time period is significant at  $p < .05$  level

Latino-white disparities in 2007-2008 are significantly different from disparities in 2002-2003

|        | 2002-2003 |      | 2003-2004 |      | 2004-2005 |      | 2005-2006 |      | 2006-2007 |      | 2007-2008 |      |
|--------|-----------|------|-----------|------|-----------|------|-----------|------|-----------|------|-----------|------|
|        | Mean      | SE   |
| White  | 96.6%     | 1.3% | 93.8%     | 1.8% | 89.8%     | 2.4% | 87.5%     | 3.0% | 84.4%     | 4.0% | 79.9%     | 4.5% |
| Black  | 91.9%     | 5.6% | 89.0%     | 6.9% | 84.2%     | 6.5% | 80.9%     | 6.7% | 87.5%     | 5.9% | 88.8%     | 5.8% |
| Latino | 85.8%     | 8.4% | 92.8%     | 4.6% | 93.3%     | 3.6% | 94.2%     | 2.7% | 96.7%     | 2.0% | 95.9%     | 3.2% |

**Appendix Table A1. Regression analyses on race and time of predictors of antidepressant prescription use among whites, blacks, and Latinos**

|                                               | <b>Variable</b>                           |          | <b>Coeff.</b> | <b>Std.<br/>Err.</b> | <b>p</b> |
|-----------------------------------------------|-------------------------------------------|----------|---------------|----------------------|----------|
| <b>Race</b><br>(reference: White)             | Black                                     |          | -.34          | .94                  |          |
|                                               | Hispanic                                  |          | -1.56         | .79                  | .047     |
| <b>Time Periods</b><br>(reference: 2002-2003) | 2004-2005                                 |          | -1.04         | .47                  | 0.028    |
|                                               | 2006-2008                                 |          | -1.93         | .45                  | <.001    |
| <b>Race*Time<br/>Interaction</b>              | Black*2004-2005                           |          | .16           | 1.08                 |          |
|                                               | Black*2006-2008                           |          | 1.01          | 1.05                 |          |
|                                               | Hispanic*2004-2005                        |          | 2.19          | 1.01                 | 0.031    |
|                                               | Hispanic*2006-2008                        |          | 4.05          | 1.10                 | <.001    |
| <b>Mental Health<br/>Variables</b>            | Psychological Impairment<br>(CIS>=16)     |          | -.47          | .30                  |          |
|                                               | Parent-reported MH<br>(reference: Exc/VG) | GFP      | -.43          | .35                  |          |
| Gender                                        | (reference: Male)                         | Female   | .08           | .28                  |          |
| Age                                           | (reference: 5-11)                         | 12-17    | .84           | .31                  | 0.007    |
| Income<br>(reference: Poor)                   | Near Poverty                              |          | -.18          | .36                  |          |
|                                               | Middle income                             |          | .40           | .39                  |          |
|                                               | High income                               |          | -.03          | .48                  |          |
| Region<br>(reference: North)                  | Midwest                                   |          | -.25          | .45                  |          |
|                                               | South                                     |          | -.02          | .42                  |          |
|                                               | West                                      |          | -.53          | .50                  |          |
| Urbanicity                                    | MSA>250K                                  |          | .40           | .29                  |          |
| Insurance                                     | (reference: Private)                      | Public   | .21           | .44                  |          |
|                                               |                                           | Medicaid | -.76          | .51                  |          |
|                                               |                                           | Unins    | -.11          | .92                  |          |
| HMO participation                             |                                           | HMO      | .01           | .26                  |          |
| Parent education                              | >=HS                                      |          | -.52          | .39                  |          |
| constant                                      |                                           |          | 3.83          | .75                  | <.001    |

Source: 2002-2008 Medical Expenditure Panel Survey (MEPS)

\* Significant at p<.05 level

<sup>1</sup>Logit Coefficients and standard errors take into account sampling weights and stratification used to make MEPS sample representative of U.S. population

**Appendix Table A2. Trends in disparities in antidepressant use across three time periods (2002-03, 2004-05, 2006-08) spanning a time period before and after the FDA black box warning on youth antidepressant use among individuals in treatment with a diagnosis of episodic mood disorder**

|               | <b>Predicted<br/>Probability</b> | <b>SE</b> | <b>Disparity</b> | <b>SE</b> | <b>p</b> | <b>Change in<br/>Disparity Since<br/>Previous Time<br/>Period</b> | <b>SE</b> | <b>p</b> |
|---------------|----------------------------------|-----------|------------------|-----------|----------|-------------------------------------------------------------------|-----------|----------|
| <b>White</b>  |                                  |           |                  |           |          |                                                                   |           |          |
| 2002-2003     | 96.8%                            | 2.5%      |                  |           |          |                                                                   |           |          |
| 2004-2005     | 91.0%                            | 3.5%      |                  |           |          |                                                                   |           |          |
| 2006-2008     | 80.7%                            | 3.7%      |                  |           |          |                                                                   |           |          |
| <b>Black</b>  |                                  |           |                  |           |          |                                                                   |           |          |
| 2002-2003     | 83.3%                            | 1.59%     | 13.4%            | 3.0%      | p<.001   |                                                                   |           |          |
| 2004-2005     | 75.1%                            | 1.4%      | 16.0%            | 3.7%      | p<.001   | 2.5%                                                              | 3.2%      |          |
| 2006-2008     | 71.6%                            | 1.3%      | 9.1%             | 3.8%      | p<.001   | -6.9%                                                             | 2.9%      | p=.019   |
| <b>Latino</b> |                                  |           |                  |           |          |                                                                   |           |          |
| 2002-2003     | 67.5%                            | 1.5%      | 29.2%            | 2.9%      | p<.001   |                                                                   |           |          |
| 2004-2005     | 84.7%                            | 1.0%      | 6.3%             | 3.6%      |          | -23.0%                                                            | 4.1%      | p<.001   |
| 2006-2008     | 95.0%                            | .8%       | -14.3%           | 3.7%      | p<.001   | -20.6%                                                            | 4.0%      | p<.001   |

<sup>1</sup>Black-white and Hispanic-white disparities are calculated implementing the IOM definition of racial/ethnic disparities

<sup>2</sup>Standard errors are calculated using the balanced repeated replication (BRR) methodology

Data: 2002-2008 Medical Expenditure Panel Survey (MEPS)
